# Supplementary material for: Determination of the highest occupied molecular orbital and conformational structures of morpholine based on its conformer-specific photoionization dynamics
Source: Royal Society of Chemistry journal article supplement (doi:10.1039/d2cp04112j), 2022-01-01
Supplement: d2cp04112j1.pdf [file d2cp04112j1.pdf]

## Electronic Supplementary Information

### Determination of the highest occupied molecular orbital and conformational structures of morpholine based on its conformer-specific photoionization dynamics

So Young Eom,<sup>†a</sup> Yu Ran Lee,<sup>b</sup> Sung Man Park<sup>a</sup> and Chan Ho Kwon<sup>\*,a</sup>

**Table S1** Relative energies (RE) and AIEs (in cm<sup>-1</sup>) of Chair-Eq and Chair-Ax calculated with zero-point energy correction at various DFT and ab-initio calculation levels

| Method    | Basis set   | RE (S <sub>0</sub> ) <sup>a</sup> |     | AIE <sub>cal</sub> <sup>b</sup> |        |
|-----------|-------------|-----------------------------------|-----|---------------------------------|--------|
|           |             | Eq                                | Ax  | Eq                              | Ax     |
| B3LYP     | cc-pVDZ     | 0.0                               | 177 | 61,903                          | 61,726 |
|           | cc-pVTZ     | 0.0                               | 246 | 62,915                          | 62,670 |
|           | aug-cc-pVDZ | 0.0                               | 277 | 63,445                          | 63,168 |
|           | aug-cc-pVTZ | 0.0                               | 255 | 63,448                          | 63,193 |
| CAM-B3LYP | cc-pVDZ     | 0.0                               | 228 | 62,985                          | 62,757 |
|           | cc-pVTZ     | 0.0                               | 285 | 64,020                          | 63,735 |
|           | aug-cc-pVDZ | 0.0                               | 305 | 64,505                          | 64,201 |
|           | aug-cc-pVTZ | 0.0                               | 286 | 64,540                          | 64,254 |
| M062x     | cc-pVDZ     | 0.0                               | 223 | 63,661                          | 63,438 |
|           | cc-pVTZ     | 0.0                               | 280 | 64,837                          | 64,557 |
|           | aug-cc-pVDZ | 0.0                               | 263 | 64,731                          | 64,468 |
|           | aug-cc-pVTZ | 0.0                               | 259 | 65,240                          | 64,981 |
| wB97X-D   | cc-pVDZ     | 0.0                               | 176 | 62,625                          | 62,449 |
|           | cc-pVTZ     | 0.0                               | 227 | 63,240                          | 63,012 |
|           | aug-cc-pVDZ | 0.0                               | 233 | 63,818                          | 63,586 |
|           | aug-cc-pVTZ | 0.0                               | 218 | 63,668                          | 63,450 |
| MP2       | cc-pVDZ     | 0.0                               | 267 | 64,635                          | 64,368 |
|           | cc-pVTZ     | 0.0                               | 315 | 67,010                          | 66,695 |
|           | aug-cc-pVDZ | 0.0                               | 310 | 66,971                          | 66,661 |
|           | aug-cc-pVTZ | 0.0                               | 308 | 67,903                          | 67,595 |

<sup>a</sup> Calculated ionic transition energy for each conformer in neutral chair form to the axial-like NH conformer in cationic chair form. <sup>b</sup> Difference of the calculated adiabatic ionization energies (AIE<sub>cal</sub>(Eq)-AIE<sub>cal</sub>(Ax)) between the equatorial and the axial conformers equals the RE of axial NH conformer, of which the average difference for aug-cc-pVTZ basis set gives 265 cm<sup>-1</sup>.

<sup>a</sup> Department of Chemistry and Institute for Molecular Science and Fusion Technology, Kangwon National University, Chuncheon 24341, Republic of Korea.

<sup>b</sup> Forensic Chemistry Division, National Forensic Service, Wonju 26460, Republic of Korea.

<sup>†</sup> Present address: Department of Chemistry, Korea University, Seoul 02841, Republic of Korea.

\* Email: [chkwon@kangwon.ac.kr](mailto:chkwon@kangwon.ac.kr) (C. H. Kwon)

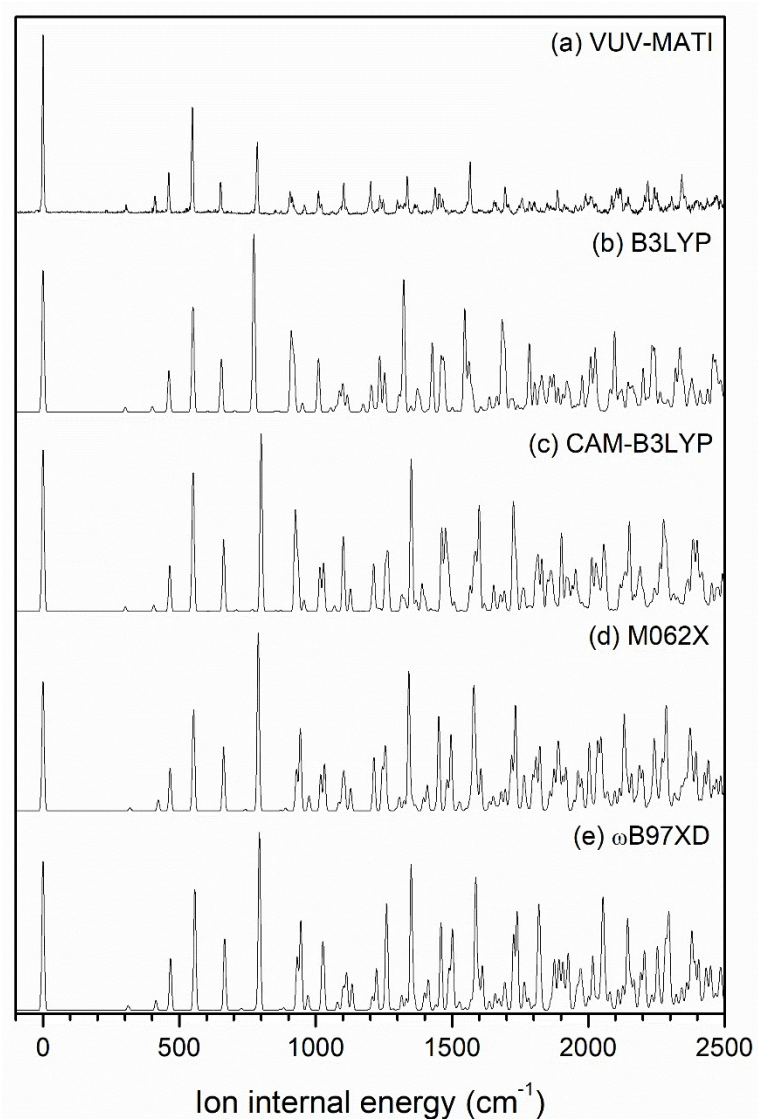

**Figure S1** (a) HR VUV-MATI spectrum of morpholine. Spectra simulated using FC factors and vibrational frequencies calculated at (b) B3LYP, (c) CAM-B3LYP, (d) M062X, and (e)  $\omega$ B97XD levels with aug-cc-pVTZ basis set for adiabatic ionic transitions between Chair-Ax and Chair-Ax-like\*\* conformers.

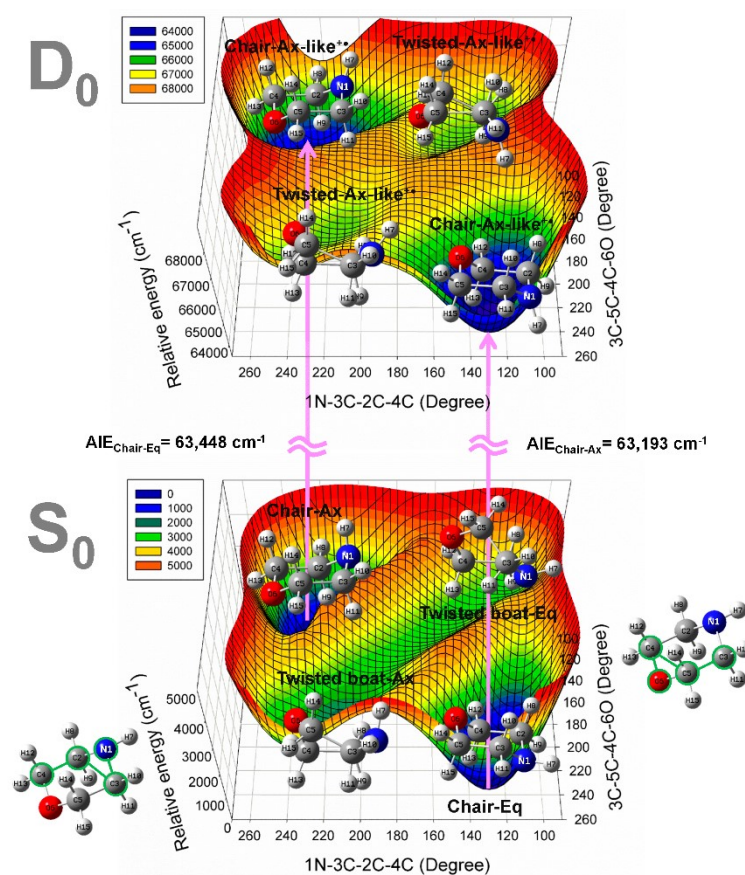

**Figure S2** 2D PESs of  $S_0$  and  $D_0$  states as functions of dihedral angles associated with two ring inversions, describing conformational interconversion between chair and twisted boat forms of morpholine as determined by optimizing remaining geometrical parameters.  $AIE_{\text{cal}}$  is adiabatic ionization energy calculated for each conformer with zero-point energy correction at B3LYP/aug-cc-pVTZ level.
